# Supplementary material
Source: Springer Nature journal article supplement (https://www.springermedizin.de/resource/supplementary/12885_2013_4349_MOESM2_ESM.pdf/9466054)
Supplement: MOESM2 [file 9466054]

## TABLE S2: SAM analyses

13-02-21

| Histotype | Sample Number |
|-----------|---------------|
| HGS       | 65            |
| CCC       | 33            |
| EC        | 29            |

### Analyses Sample Numbers:

|             | n  |
|-------------|----|
| CCC vs. HGS | 98 |
| EC vs. HGS  | 94 |

Note: Protein levels are measured relative to HGS protein expression.

### CCC vs HGS

### PROTEINS UP-REGULATED

| Protein RPPA ID                | Score(d) | Numerator(r) | Denominator(s+s0) | Fold Change | FDR(%)* |
|--------------------------------|----------|--------------|-------------------|-------------|---------|
| HSP27 (c)                      | 5.413    | 0.866        | 0.16              | 1.822       | 0       |
| 4EBP1pS65                      | 5.354    | 0.562        | 0.105             | 1.476       | 0       |
| CCNE1                          | 4.671    | 1.039        | 0.222             | 2.055       | 0       |
| p38pT180                       | 4.078    | 0.717        | 0.176             | 1.644       | 0       |
| $\beta$ Catenin                | 3.182    | 0.431        | 0.136             | 1.349       | 0       |
| ACC1 (c)                       | 3.054    | 0.485        | 0.159             | 1.4         | 0       |
| HSP70 (c)                      | 3.044    | 0.611        | 0.201             | 1.527       | 0       |
| SRCpY416                       | 3.019    | 0.494        | 0.164             | 1.409       | 0       |
| Ecadherin                      | 2.974    | 0.7          | 0.235             | 1.625       | 0       |
| RAD51 (c)                      | 2.967    | 0.382        | 0.129             | 1.303       | 0       |
| ACCpS79                        | 2.612    | 0.443        | 0.17              | 1.359       | 0       |
| p38                            | 2.466    | 0.312        | 0.126             | 1.241       | 0       |
| STAT5pY694 (vp)                | 2.401    | 0.363        | 0.151             | 1.286       | 0       |
| SMAD3                          | 2.394    | 0.354        | 0.148             | 1.278       | 0       |
| p21                            | 2.185    | 0.222        | 0.102             | 1.167       | 0       |
| AKTpT308                       | 2.168    | 0.364        | 0.168             | 1.287       | 0       |
| STAT3pS727 (vp)                | 1.853    | 0.295        | 0.159             | 1.227       | 0       |
| STAT6pY641 (vp)                | 1.819    | 0.232        | 0.128             | 1.175       | 0       |
| GSK-3 $\beta$ pS9              | 1.507    | 0.171        | 0.114             | 1.126       | 2.828   |
| GSK3-3 $\alpha$ / $\beta$ pS21 | 1.457    | 0.194        | 0.133             | 1.144       | 2.828   |
| GATA-2                         | 1.446    | 0.219        | 0.151             | 1.164       | 2.828   |
| p90RSKpT359 (c)                | 1.293    | 0.137        | 0.106             | 1.1         | 5.12    |
| S6pS235                        | 1.267    | 0.267        | 0.21              | 1.203       | 5.12    |
| p27                            | 1.25     | 0.197        | 0.158             | 1.146       | 5.12    |
| EIF4E                          | 1.248    | 0.148        | 0.118             | 1.108       | 5.12    |
| AKTpS473                       | 1.2      | 0.256        | 0.214             | 1.194       | 5.12    |

|                    |       |       |       |       |        |
|--------------------|-------|-------|-------|-------|--------|
| CD31               | 1.162 | 0.114 | 0.098 | 1.082 | 5.12   |
| S6pS240            | 1.106 | 0.187 | 0.169 | 1.139 | 6.259  |
| EGFRpY1173         | 1.102 | 0.145 | 0.131 | 1.105 | 6.259  |
| Transglut          | 1.059 | 0.23  | 0.218 | 1.173 | 6.259  |
| BCL2               | 0.982 | 0.151 | 0.154 | 1.11  | 10.443 |
| EGFR               | 0.934 | 0.118 | 0.127 | 1.086 | 10.443 |
| 14-3-3 Epsilon (c) | 0.821 | 0.082 | 0.1   | 1.058 | 15.536 |
| CCND1              | 0.793 | 0.104 | 0.131 | 1.075 | 15.536 |
| 14-3-3 $\beta$     | 0.679 | 0.08  | 0.117 | 1.057 | 17.435 |
| STAT3 (vp)         | 0.622 | 0.092 | 0.148 | 1.066 | 20.929 |

### CCC vs HGS

### PROTEINS DOWN-REGULATED

| Protein RPPA ID        | Score(d) | Numerator(r) | Denominator(s+s0) | Fold Change | FDR(%)* |
|------------------------|----------|--------------|-------------------|-------------|---------|
| AKT                    | -1.903   | -0.367       | 0.193             | 0.776       | 0       |
| MIG-6                  | -1.797   | -0.218       | 0.121             | 0.86        | 0       |
| MAPKpT202 Y204         | -1.656   | -0.39        | 0.235             | 0.763       | 1.116   |
| PTEN                   | -1.656   | -0.276       | 0.167             | 0.826       | 1.116   |
| CAV1                   | -1.629   | -0.538       | 0.33              | 0.689       | 1.116   |
| CHK2 (c)               | -1.462   | -0.239       | 0.164             | 0.847       | 2.828   |
| Telomerase (c)         | -1.445   | -0.145       | 0.1               | 0.905       | 2.828   |
| 4EBP1                  | -1.443   | -0.189       | 0.131             | 0.877       | 2.828   |
| PKC $\alpha$ pS657 (c) | -1.406   | -0.146       | 0.104             | 0.904       | 2.828   |
| SRCpY527               | -1.331   | -0.141       | 0.106             | 0.907       | 2.828   |
| 4EBP1pT37 T46          | -1.295   | -0.213       | 0.164             | 0.863       | 2.828   |
| CCNB1                  | -1.266   | -0.396       | 0.313             | 0.76        | 4.079   |
| PR                     | -1.189   | -0.325       | 0.273             | 0.798       | 4.079   |
| EIG121 (c)             | -1.166   | -0.158       | 0.136             | 0.896       | 4.079   |
| ATRIP (c)              | -1.162   | -0.14        | 0.12              | 0.908       | 4.079   |
| p85                    | -1.161   | -0.141       | 0.122             | 0.907       | 4.079   |
| LCK (c)                | -0.972   | -0.146       | 0.15              | 0.904       | 10.443  |
| XRCC1                  | -0.93    | -0.095       | 0.102             | 0.936       | 10.443  |
| CICasp7 (c)            | -0.825   | -0.19        | 0.23              | 0.877       | 11.57   |
| Collagen VI            | -0.768   | -0.134       | 0.175             | 0.911       | 11.57   |
| p70S6K                 | -0.73    | -0.116       | 0.158             | 0.923       | 15.536  |
| PCNA (c)               | -0.699   | -0.085       | 0.122             | 0.943       | 15.536  |
| PDK1pS241              | -0.676   | -0.077       | 0.114             | 0.948       | 17.435  |
| TSC2                   | -0.563   | -0.066       | 0.116             | 0.956       | 20.929  |

### EC vs HGS

### PROTEINS UP-REGULATED

| Protein RPPA ID | Score(d) | Numerator(r) | Denominator(s+s0) | Fold Change | FDR(%)* |
|-----------------|----------|--------------|-------------------|-------------|---------|
| PR              | 7.17     | 2.548        | 0.355             | 5.848       | 0       |
| CCND1           | 3.854    | 0.545        | 0.142             | 1.46        | 0       |
| AMPKpT172       | 3.569    | 0.626        | 0.175             | 1.543       | 0       |
| IRS1            | 3.313    | 0.546        | 0.165             | 1.46        | 0       |
| BCL2            | 2.346    | 0.393        | 0.168             | 1.313       | 0       |

|                    |       |       |       |       |        |
|--------------------|-------|-------|-------|-------|--------|
| COX2 (c)           | 2.223 | 0.368 | 0.166 | 1.291 | 0      |
| AKTpT308           | 2.194 | 0.395 | 0.18  | 1.315 | 0      |
| p21                | 1.901 | 0.204 | 0.107 | 1.152 | 1.721  |
| ERapS118           | 1.807 | 0.302 | 0.167 | 1.233 | 1.721  |
| EIG121 (c)         | 1.707 | 0.261 | 0.153 | 1.198 | 2.816  |
| SYK                | 1.686 | 0.392 | 0.233 | 1.312 | 2.816  |
| Er $\alpha$        | 1.652 | 0.499 | 0.302 | 1.413 | 2.816  |
| HSP70 (c)          | 1.602 | 0.356 | 0.222 | 1.28  | 2.816  |
| CHK1 (c)           | 1.507 | 0.182 | 0.12  | 1.134 | 4.891  |
| 4EBP11pS65         | 1.49  | 0.166 | 0.111 | 1.122 | 4.891  |
| 14-3-3 Epsilon(c)  | 1.441 | 0.152 | 0.106 | 1.111 | 4.891  |
| EGFR               | 1.345 | 0.197 | 0.147 | 1.147 | 4.891  |
| AKTpS473           | 1.287 | 0.296 | 0.23  | 1.228 | 6.864  |
| SRCPY416 (c)       | 1.275 | 0.221 | 0.173 | 1.165 | 6.864  |
| $\alpha$ Catenin   | 1.23  | 0.166 | 0.135 | 1.122 | 6.864  |
| EGFRpY1173         | 1.15  | 0.162 | 0.141 | 1.119 | 7.228  |
| GSK-3 $\beta$ pS21 | 1.081 | 0.142 | 0.132 | 1.104 | 7.228  |
| ACC1 (c)           | 1.064 | 0.164 | 0.154 | 1.12  | 7.228  |
| SMAD3              | 1.004 | 0.138 | 0.138 | 1.1   | 11.616 |
| RAD51 (c)          | 0.975 | 0.116 | 0.119 | 1.084 | 11.616 |
| GATA3              | 0.885 | 0.116 | 0.131 | 1.083 | 11.616 |
| GATA2 (vp)         | 0.878 | 0.148 | 0.168 | 1.108 | 11.616 |
| IGFR $\beta$ (c)   | 0.878 | 0.155 | 0.176 | 1.113 | 11.616 |
| EIF4E              | 0.851 | 0.108 | 0.127 | 1.078 | 11.616 |
| p38pT180 Y182      | 0.787 | 0.147 | 0.187 | 1.107 | 17.156 |
| ELF2ApS51 (vp)     | 0.766 | 0.108 | 0.141 | 1.077 | 17.156 |
| HSP27 (c)          | 0.765 | 0.164 | 0.215 | 1.121 | 17.156 |
| ACCpS79            | 0.753 | 0.126 | 0.168 | 1.092 | 17.156 |
| PDK1pS241          | 0.721 | 0.087 | 0.121 | 1.062 | 17.156 |
| STAT6pY641 (vp)    | 0.683 | 0.096 | 0.14  | 1.068 | 17.156 |
| CD31               | 0.674 | 0.067 | 0.1   | 1.048 | 17.156 |
| 14-3-3 $\beta$     | 0.671 | 0.08  | 0.12  | 1.057 | 17.156 |
| ATM (c)            | 0.616 | 0.114 | 0.186 | 1.082 | 20.287 |
| SRC                | 0.609 | 0.122 | 0.201 | 1.088 | 20.287 |
| BRAF (c)           | 0.59  | 0.089 | 0.151 | 1.064 | 20.287 |

## EC vs HGS

## PROTEINS DOWN-REGULATED

| Protein RPPA ID | Score(d) | Numerator(r) | Denominator(s+s0) | Fold Change | FDR(%)* |
|-----------------|----------|--------------|-------------------|-------------|---------|
| CofilinpS3 (vp) | -3.525   | -0.765       | 0.217             | 0.588       | 0       |
| STAT5           | -3.244   | -0.662       | 0.204             | 0.632       | 0       |
| GAB2            | -3.198   | -0.649       | 0.203             | 0.638       | 0       |
| c-Myc           | -2.966   | -0.44        | 0.148             | 0.737       | 0       |
| YAP             | -2.78    | -0.308       | 0.111             | 0.808       | 0       |
| S6pS235         | -2.713   | -0.545       | 0.201             | 0.685       | 0       |
| CCNE1           | -2.667   | -0.52        | 0.195             | 0.697       | 0       |
| S6pS240         | -2.644   | -0.408       | 0.154             | 0.754       | 0       |

|                  |        |        |       |       |        |
|------------------|--------|--------|-------|-------|--------|
| Transglut        | -2.635 | -0.54  | 0.205 | 0.688 | 0      |
| 4EBP1pT37        | -2.549 | -0.466 | 0.183 | 0.724 | 0      |
| FKHRL1pS318 (c)  | -2.498 | -0.503 | 0.201 | 0.706 | 0      |
| CCNB1            | -2.141 | -0.796 | 0.372 | 0.576 | 0      |
| MAPKpT202.Y204   | -2.113 | -0.539 | 0.255 | 0.688 | 0      |
| STAT3pS727 (vp)  | -1.863 | -0.296 | 0.159 | 0.814 | 0      |
| 14-3-3 zeta      | -1.797 | -0.245 | 0.136 | 0.844 | 0      |
| cJUNpS73         | -1.765 | -0.212 | 0.12  | 0.864 | 0      |
| p70S6KpT389      | -1.618 | -0.222 | 0.137 | 0.857 | 1.721  |
| BIM              | -1.617 | -0.315 | 0.195 | 0.804 | 1.721  |
| MEK1_2pS217.S22: | -1.561 | -0.208 | 0.133 | 0.866 | 1.721  |
| STAT3 (vp)       | -1.429 | -0.2   | 0.14  | 0.87  | 2.816  |
| PKCA $\alpha$    | -1.362 | -0.235 | 0.172 | 0.85  | 2.816  |
| SRCPY527         | -1.291 | -0.133 | 0.103 | 0.912 | 4.891  |
| Telomerase (c)   | -1.231 | -0.126 | 0.102 | 0.917 | 6.864  |
| p90RSKpT359 (c)  | -1.176 | -0.123 | 0.104 | 0.919 | 6.864  |
| MIG-6            | -1.035 | -0.113 | 0.109 | 0.925 | 11.616 |
| CAV1             | -1.001 | -0.362 | 0.362 | 0.778 | 11.616 |
| PCNA (c)         | -0.996 | -0.126 | 0.126 | 0.917 | 11.616 |
| MEK1             | -0.86  | -0.137 | 0.16  | 0.909 | 17.156 |
| p85              | -0.808 | -0.098 | 0.121 | 0.934 | 17.156 |
| ATRIP (c)        | -0.765 | -0.095 | 0.124 | 0.936 | 20.287 |
| Collagen VI      | -0.748 | -0.142 | 0.189 | 0.907 | 20.287 |

Note:

All antibodies validated with the exception of the following notations:

(c) = Caution - Further testing pending

(vp) = validation still pending

\* FDR = False discovery rate

Within each group, the percent probability that the difference in protein expression for each comparison is attributable to chance after correcting for multiple parameter testing.
